# Supplementary material for: Impacts of Nitrogen Addition on Nitrous Oxide Emission: Model-Data Comparison
Source: Copernicus journal article supplement (doi:10.5194/bg-2018-126), 2018-03-28
Supplement: Supplementary file 1 [file bg-2018-126-supplement.pdf]

## Supplemental Online Material

Description of model algorithms:

### 1. DayCENT model

N<sub>2</sub>O emission from nitrification ( $F_{nt}$ , g N m<sup>-2</sup> day<sup>-1</sup>):

$$5 \quad F_{nt} = k_1 R_{nt} \quad (S1)$$

$$R_{nt} = Net_m k_2 + k_{max} C_{NH_4^+} f_{nt}(T_s) f_{nt}(WFPS) f_{nt}(pH) \quad (S2)$$

$$f_{nt}(T_s) = \exp(-0.03(T_s - T_{opt})^2) \quad (S3)$$

$$f_{nt}(WFPS) = \left(\frac{WFPS-b}{a-b}\right)^{\frac{d(b-a)}{a-c}} \left(\frac{WFPS-c}{a-c}\right) \quad (S4)$$

$$f_{nt}(pH) = 0.56 + \arctan(0.45(-5 + pH)\pi)/\pi \quad (S5)$$

10 where  $R_{nt}$  is the rate of nitrification (g N m<sup>-2</sup> day<sup>-1</sup>);  $k_1$  is the fraction of nitrified N lost as N<sub>2</sub>O flux;  $Net_m$  is the daily net N mineralization from soil organic matter (kg N m<sup>-2</sup> day<sup>-1</sup>);  $k_2$  is the fraction of net mineralization that is assumed to be nitrified each day;  $C_{NH_4^+}$  is soil ammonium content (g N m<sup>-2</sup>);  $k_{max}$  is the maximum fraction of ammonium nitrified and is set to 0.10 day<sup>-1</sup>;  $f_{nt}(T_s)$ ,  $f_{nt}(WFPS)$  and  $f_{nt}(pH)$  are the effect of soil temperature, water and soil pH on nitrification, respectively;  $T_s$  and  $WFPS$  are soil temperature (°C) and soil water-filled pore space (%);  $T_{opt}$  is soil optimal temperature  
15 for nitrification and is set to 25°C; Parameter a, b, c, d are 0.55, 1.70, -0.007, 3.22 respectively for sandy soil, and 0.60, 1.27, 0.0012, 2.84 respectively for medium-textured soil (Parton et al., 1996, 2001);

N<sub>2</sub>O emission from denitrification ( $F_{dn}$ , g N m<sup>-2</sup> day<sup>-1</sup>):

$$F_{dn} = D_{ttl}/(1 + R_{N_2/N_2O}) \quad (S6)$$

$$D_{ttl} = \min(f_{dn}(NO_3^-), f_{dn}(CO_2)) f_{dn}(WFPS) \quad (S7)$$

$$20 \quad R_{N_2/N_2O} = f_r(R_{NC}) f_r(WFPS) \quad (S8)$$

$$f_{dn}(NO_3^-) = 1.15(C_{NO_3^-})^{0.57} \quad (S9)$$

$$f_{dn}(CO_2) = 0.1(CO_2)^{1.3} \quad (S10)$$

$$f_{dn}(WFPS) = 0.5 \operatorname{atan}(0.6\pi(0.1WFPS - \alpha))/\pi \quad (S11)$$

$$f_r(R_{NC}) = \max(0.16k_1, k_1 e^{-0.8R_{NC}}) \quad (S12)$$

$$25 \quad R_{NC} = C_{NO_3^-}/CO_2 \quad (S13)$$

$$k_1 = \max(1.7, 38.4 - 350 \operatorname{Diff}_{FC}) \quad (S14)$$

$$\operatorname{Diff}_{FC} = \alpha WFPS + \beta \quad (S15)$$

$$f_r(CO_2) = 13 + 30.78 \operatorname{atan}(0.07(CO_2 - 13)\pi)/\pi \quad (S16)$$

$$f_r(WFPS) = 1.4/13^{(17/(13^{2.2WFPS}))} \quad (S17)$$

30 where  $D_{ttl}$  is total nitrogen gas (N<sub>2</sub>O and N<sub>2</sub>) (g N ha<sup>-1</sup> day<sup>-1</sup>) from denitrification;  $R_{N_2/N_2O}$  is the ratio of N<sub>2</sub> and N<sub>2</sub>O;

$f_{dn}(NO_3^-)$  and  $f_{dn}(CO_2)$  are, respectively, the maximum total N gas fluxes ( $g\ N\ ha^{-1}\ day^{-1}$ ) for a given soil nitrate level and respiration rate;  $f_{dn}(WFPS)$  is the effect of WFPS on denitrification rate;  $f_r(R_{NC})$  is used to estimate the ratio of  $N_2/N_2O$  based on the ratio ( $R_{NC}$ ) of soil nitrate content and soil respiration;  $f_r(WFPS)$  are the effect of soil nitrate and soil respiration and WFPS on the ratio of  $N_2$  and  $N_2O$ ;  $CO_2$  is soil respiration rate ( $kg\ C\ ha^{-1}\ day^{-1}$ );  $k_1$  is a parameter controlling the maximum value of the  $N_2/N_2O$  ratio function;  $Diff_{FC}$  is a gas diffusion coefficient (Parton et al., 1996); Parameter  $\alpha$ ,  $\beta$  are  $-0.375$ ,  $0.233$ , respectively for sandy soil, and  $-0.464$ ,  $0.145$ , respectively, for medium-textured soil (Del Grosso et al., 2000; Parton et al., 1996, 2001).

## 2. DNDC model

40  $N_2O$  emission from nitrification ( $F_{nt}$ ,  $g\ N\ m^{-3}\ day^{-1}$ ):

$$F_{nt} = 0.0006R_{nt}f_{nt}(T_s)WFPS \quad (S18)$$

$$R_{nt} = R_{nt,max}C_{NH_4^+}B_n pH \quad (S19)$$

$$R_g = R_{g,max}(DOC/(1 + DOC) + f_{nt}(M_s)/(1 + f_{nt}(M_s))) \quad (S20)$$

$$R_d = R_{d,max}B_n/(5 + DOC)/(1 + f_{nt}(M_s)) \quad (S21)$$

45  $R_b = (R_g - R_d)B_n f_{nt}(T_s) f_{nt}(M_s) \quad (S22)$

$$f_{nt}(T_s) = ((60 - T_s)/25.78)^{3.503} e^{(3.503(T_s - 34.22))/25.78} \quad (S23)$$

$$f_{nt}(M_s) = \begin{cases} 1.01 - 0.21WFPS & WFPS > 0.05 \\ 0 & WFPS \leq 0.05 \end{cases} \quad (S24)$$

where  $R_{nt}$  and  $R_{nt,max}$  are relative and maximum nitrification rate ( $l\ h^{-1}$ ), respectively;  $B_n$  is biomass of nitrifier ( $kg\ C\ ha^{-1}$ );  $R_g$  is relative growth rate of nitrifier;  $R_{g,max}$  is maximum growth rate of nitrifier ( $4.87\ l\ day^{-1}$ , Blagodatsky and Richter, 1998);  $DOC$  is concentration of dissolved organic C ( $kg\ C\ ha^{-1}$ );  $R_d$  is relative death rate of nitrifier;  $R_{d,max}$  is maximum death rate of nitrifier ( $1.44\ l\ day^{-1}$ , Blagodatsky and Richter, 1998);  $R_b$  is net increase in nitrifiers biomass;  $pH$  is soil pH;  $f_{nt}(T_s)$  and  $f_{nt}(M_s)$  are the factors of soil temperature and soil moisture, respectively.

$N_2O$  emission from denitrification ( $F_{dn}$ ,  $g\ N\ m^{-3}\ day^{-1}$ ):

$$\mu_{NO_x} = \mu_{NO_x,m} DOC / (K_c + DOC) C_{NO_x} / (K_n + C_{NO_x}) \quad (S25)$$

55  $\mu_{g,t} = f_{dn}(T_s)(\mu_{NO_3} f_{pH1} + \mu_{NO_2} f_{pH2} + \mu_{NO} f_{pH2} + \mu_{N_2O} f_{pH3}) \quad (S26)$

$$F_{dn} = V_{diff}(C_{N_2O} + R_{N_2O,p} - R_{N_2O,c}) \quad (S27)$$

$$V_{diff} = D_m AFPS(1 - ANVF) F_{clay} 2^{T_s/20} \quad (S28)$$

$$F_{clay} = 0.13 - 0.079 C_{clay} \quad (S29)$$

$$f_{dn}(T_s) = 2^{(T_s - 22.5)/10} \quad (S30)$$

60  $f_{pH1} = 1 - 1/(1 + e^{(pH - 4.25)/0.5}) \quad (S31)$

$$f_{pH2} = 1 - 1/(1 + e^{(pH - 5.25)/1.0}) \quad (S32)$$

$$f_{pH3} = 1 - 1/(1 + e^{(pH-6.25)/1.5}) \quad (S33)$$

$$R_g = R_{g,t}B_d \quad (S34)$$

$$R_d = M_c Y_c B_d \quad (S35)$$

$$65 \quad R_c = (R_{g,t}/Y_c + M_c)B_d \quad (S36)$$

$$R_{NO_x} = (\mu_{NO_x}/Y_{NO_x} + M_{NO_x}C_{NO_x}/C_N)B_d \quad (S37)$$

where  $\mu_{NO_x}$  and  $\mu_{NO_x,m}$  are the relative and maximum growth rate of  $NO_x$  denitrifier ( $l\ h^{-1}$ ), respectively;  $C_{NO_x}$  is the concentration of  $NO_x$  ( $kg\ N\ m^{-3}$ );  $DOC$  is soluble C concentration ( $kg\ C\ m^{-3}$ );  $K_c$  and  $K_n$  are respectively half-saturation value of soluble carbon and N oxides ( $0.017\ kg\ C\ m^{-3}$  and  $0.083\ kg\ N\ m^{-3}$ , Shan and Coulman, 1978);  $\mu_{g,t}$  is the relative growth rate of total denitrifier ( $l\ h^{-1}$ );  $\mu_{NO_3}$ ,  $\mu_{NO_2}$ ,  $\mu_{NO}$  and  $\mu_{N_2O}$  are relative growth rate of  $NO_3^-$ ,  $NO_2^-$ ,  $NO$  and  $N_2O$  denitrifiers ( $l\ h^{-1}$ ), respectively;  $f_{pH1}$ ,  $f_{pH2}$  and  $f_{pH3}$  are pH factors for  $NO_3^-$ ,  $NO_2^-$ ,  $NO$  and  $N_2O$  denitrifiers, respectively;  $V_{diff}$  is the gas diffusion factor of  $N_2O$  (%);  $C_{N_2O}$ ,  $R_{N_2O,p}$  and  $R_{N_2O,c}$  are initial concentration ( $g\ N\ m^{-3}$ ), production and consumption rate ( $g\ N\ m^{-3}\ day^{-1}$ ) of  $N_2O$ , respectively;  $D_m$  is maximum diffusion rate in air ( $m^2\ h^{-1}$ ); AFPS is air-filled porosity (%); ANVF is volumetric fraction of anaerobic microsities;  $F_{clay}$  is clay factor;  $C_{clay}$  is clay fraction in soil;  $R_g$  is the growth rate of total denitrifier ( $l\ h^{-1}$ );  $B_d$  is denitrifier biomass ( $kg\ C\ m^{-3}$ );  $R_d$  is denitrifier death rate ( $l\ h^{-1}$ );  $M_c$  is maintenance coefficient on carbon ( $0.0076\ kg\ N\ kg^{-1}\ h^{-1}$ , Van Verseveld et al., 1977);  $Y_c$  is maximum growth rate of denitrifier on soluble carbon ( $0.503\ kg\ C\ kg^{-1}\ C$ , Van Verseveld et al., 1977);  $R_c$  is consumption rate of soluble carbon ( $kg\ C\ m^{-3}\ h^{-1}$ ).  $Y_{NO_x}$  is maximum growth rate on N oxides ( $kg\ N\ kg^{-1}\ C$ );  $M_{NO_x}$  maintainance coefficient on N oxides ( $kg\ N\ kg^{-1}\ C$ );  $C_N$  is the concentration of all  $NO_x$  ( $kg\ N\ m^{-3}$ ).

80

### 3. DLEM model

$N_2O$  emission from nitrification ( $F_{nt}$ ,  $g\ N\ m^{-3}\ day^{-1}$ ):

$$F_{nt} = 0.001R_{nt}(10^{0.026vwc/\emptyset-1.66})/(1 + 10^{0.026vwc/\emptyset-1.66}) \quad (S38)$$

$$R_{nt} = \min(R_{pnt}, C_{NH_4^+}) \quad (S39)$$

$$85 \quad R_{pnt} = V_{nt,max}C_{NH_4^+}/(C_{NH_4^+} + Km_{nt})f_{nt}(T_s)f_{nt}(vwc) \quad (S40)$$

$$f_{nt}(T_s) = Q_{10,nt}^{((T_s-T_{opt,nt})/10)} \quad (S41)$$

$$f_{nt}(vwc) = \begin{cases} 1.17\ vwc/vwc_{fc} + 0.165 & vwc < vwc_{fc} \\ 1 - 0.1\ vwc/vwc_{fc} & vwc \geq vwc_{fc} \end{cases} \quad (S42)$$

where  $R_{nt}$  is the rate of nitrification ( $g\ N\ m^{-3}\ day^{-1}$ );  $vwc$  and  $\emptyset$  are soil volumetric water content and porosity, respectively;  $R_{pnt}$  is the potential nitrification rate ( $g\ N\ m^{-3}\ day^{-1}$ );  $C_{NH_4^+}$  is soil ammonium content( $g\ N\ m^{-3}$ );  $V_{nt,max}$  is potential nitrification rate without limitation ( $g\ N\ m^{-3}\ day^{-1}$ );  $f_{nt}(T_s)$  and  $f_{nt}(vwc)$  are respectively the effect of soil temperature and water on nitrification;  $vwc_{fc}$  is the volumetric water content at field capacity;  $Q_{10,nt}$  is the temperature sensitivity of nitrification, which is set to 2;  $T_{opt,nt}$  is the optimum temperature for nitrification, which is set to  $20^\circ C$  (Tian et al., 2010).

N<sub>2</sub>O emission from denitrification ( $F_{dn}$ , g N m<sup>-3</sup> day<sup>-1</sup>):

$$F_{dn} = R_{dn}(10^{0.026vwc/\theta-1.66})/(1 + 10^{0.026vwc/\theta-1.66}) \quad (S43)$$

95

$$R_{dn} = \min(R_{pdn}, C_{NO_3^-}) \quad (S44)$$

$$R_{pdn} = V_{dn,max}C_{NO_3^-}/(C_{NO_3^-} + Km_{dn})f_{dn}(T_s)f_{dn}(vwc) \quad (S45)$$

$$f_{dn}(T_s) = Q_{10,dn}^{((T_s-T_{opt,dn})/10)} \quad (S46)$$

$$f_{dn}(vwc) = \begin{cases} 0.0 & vwc < vwc_{fc} \\ vwc/vwc_{fc} & vwc \geq vwc_{fc} \end{cases} \quad (S47)$$

where  $R_{dn}$  is the actual rate of denitrification (g N m<sup>-3</sup> day<sup>-1</sup>);  $R_{pdn}$  is the potential rate of denitrification (g N m<sup>-3</sup> day<sup>-1</sup>);  $C_{NO_3^-}$  is soil nitrate content (g N m<sup>-3</sup>);  $V_{dn,max}$  is the potential rate of denitrification without limitation (g N m<sup>-3</sup> day<sup>-1</sup>);  $f_{dn}(T_s)$  and  $f_{dn}(vwc)$  are respectively the effect of soil temperature and water on denitrification;  $Q_{10,dn}$  is the temperature sensitivity of denitrification, which is set to 3;  $T_{opt,dn}$  is the optimum temperature for denitrification, which is set to 25°C (Tian et al., 2010).

#### 105 4. DyN model

N<sub>2</sub>O emission from nitrification ( $F_{nt}$ , g N m<sup>-2</sup> day<sup>-1</sup>):

$$F_{nt} = r_{nt}R_{nt}f_{st,diff} (1 - C_w) \quad (S48)$$

$$R_{nt} = F_{max}f_{st,nt}C_{NH_4^+,aerobic} \quad (S49)$$

$$f_{st,diff} = \min(1, \exp(308.56(1/71.02 - 1/(T_s + 46.02)))) \quad (S50)$$

110

$$f_{st,nt} = \text{pow}((70 - T_s)/(70 - 38), 12)\exp(12(T_s - 38)/(70 - 38)) \quad (S51)$$

where  $R_{nt}$  is the rate of nitrification (kg N m<sup>-3</sup> day<sup>-1</sup>);  $r_{nt}$  is the ratio of N<sub>2</sub>O production from nitrification;  $f_{st,diff}$  is the effect of soil temperature on diffusion of N<sub>2</sub>O from soil into air;  $C_w$  is soil water content;  $F_{max}$  is the maximum fraction of ammonium nitrified;  $f_{st,nt}$  is temperature factor for nitrification;  $C_{NH_4^+,aerobic}$  is soil ammonium content (mg N kg<sup>-1</sup>) in aerobic microsites of soil layer (Xu et al., 2008).

115

N<sub>2</sub>O emission from denitrification ( $F_{dn}$ , g N m<sup>-3</sup> day<sup>-1</sup>):

$$F_{dn} = r_{dn}f_{st,dn}N_2f_{st,diff} (1 - C_w) \quad (S52)$$

$$N_2 = DN_{max}f_{st,dn}NO_2^-/(NO_2^- + K_n) \quad (S53)$$

$$NO_2^- = DN_{max}f_{st,dn}NO_3^-/(NO_3^- + K_n) \quad (S54)$$

$$DN_{max} = LCA/(LCA + K_c) \quad (S55)$$

120

$$f_{st,dn} = \exp(1, \exp(308.56(1/68.02 - 1/(T_s + 46.02)))) \quad (S56)$$

where  $N_2$  is the rate of transformation of nitrite to N<sub>2</sub> (g N m<sup>-3</sup> day<sup>-1</sup>);  $r_{dn}$  is the ratio of N<sub>2</sub>O production from denitrification;  $f_{st,dn}$  is temperature factor for denitrification;  $DN_{max}$  is the maximum rate of denitrification (g N m<sup>-3</sup> day<sup>-1</sup>);  $NO_2^-$  is the transformation of nitrate to nitrite (g N m<sup>-3</sup> day<sup>-1</sup>);  $NO_3^-$  is the availability of nitrate (g N m<sup>-3</sup> day<sup>-1</sup>);  $LCA$  is labile carbon

availability ( $\text{kg C m}^{-3}$ );  $K_c$  and  $K_n$  are Michaelis–Menten constant (half–saturation values) for labile C and N oxides, which  
 125 are set to  $0.017 \text{ kg C m}^{-3}$  and  $0.083 \text{ kg N m}^{-3}$ , respectively (Li et al., 1992).

## 5. NOE model

$\text{N}_2\text{O}$  emission from nitrification ( $F_{nt}$ ,  $\text{kg N ha}^{-1} \text{ day}^{-1}$ ):

$$F_{nt} = \begin{cases} zR_{nt}WFPS < 0.62 \\ r_{max}zR_{nt} & 0.62 \leq WFPS \leq 0.80 \\ 0 & WFPS > 0.80 \end{cases} \quad (\text{S57})$$

$$130 \quad R_{nt} = R_w f_{NH_4^+} f_{st} \quad (\text{S58})$$

$$R_w = aC_w + b \quad (\text{S59})$$

$$f_{NH_4^+} = C_{NH_4^+} / (C_{NH_4^+} + Km_1) \quad (\text{S60})$$

$$f_{st} = \begin{cases} \exp[(T_s - 11) \ln(89) - 9 \ln(2.1)] & st < 11^\circ\text{C} \\ \exp[(T_s - 20) \ln(2.1)/10] & st \geq 11^\circ\text{C} \end{cases} \quad (\text{S61})$$

where  $R_{nt}$  is the actual nitrification rate ( $\text{kg N ha}^{-1} \text{ day}^{-1}$ );  $R_w$ ,  $f_{NH_4^+}$  and  $f_{st}$  are response functions to soil water content,  
 135 ammonium content and soil temperature, respectively;  $C_w$  is soil gravimetric water content (%);  $C_{NH_4^+}$  and  $st$  are soil  
 ammonium concentration ( $\text{mg N kg}^{-1} \text{ soil}$ ) and soil temperature ( $^\circ\text{C}$ ), respectively; Parameter  $Km_1$  is half saturation  
 coefficient and set to  $10 \text{ mg N L}^{-1}$ ;  $z$  and  $r_{max}$  are the fractions of nitrogen emitted during nitrification and denitrification.  $a$   
 and  $b$  are the slope and intercept, respectively, of the linear relationship between soil nitrification rate and soil gravimetric  
 water content.

140  $\text{N}_2\text{O}$  emission from denitrification ( $F_{dn}$ ,  $\text{kg N ha}^{-1} \text{ day}^{-1}$ ):

$$F_{dn} = r_{max}R_{dn} \quad (\text{S62})$$

$$R_{dn} = R_{pdn} f_{NO_3^-} f_{WFPS} f_{st} \quad (\text{S63})$$

$$f_{NO_3^-} = C_{NO_3^-} / (C_{NO_3^-} + Km_2) \quad (\text{S64})$$

$$f_{WFPS} = \begin{cases} 0 & WFPS < 0.62 \\ ((WFPS - 0.62)/0.38)^{1.74} & WFPS \geq 0.62 \end{cases} \quad (\text{S65})$$

145 where  $R_{dn}$  and  $R_{pdn}$  are soil actual and potential denitrification rate ( $\text{kg N ha}^{-1} \text{ day}^{-1}$ ), respectively;  $f_{NO_3^-}$ ,  $f_{WFPS}$  and  $f_{st}$  are  
 response factors to soil nitrate content, water–filled pore space and temperature, respectively;  $C_{NO_3^-}$  is soil nitrate  
 concentration ( $\text{mg N kg}^{-1} \text{ soil}$ );  $Km_2$  is half saturation coefficient and is set to  $22 \text{ mg N kg}^{-1} \text{ soil}$  (Heault et al., 2005).

## 6. NGAS model

150  $\text{N}_2\text{O}$  emission from nitrification ( $F_{nt}$ ,  $\text{g N ha}^{-1} \text{ day}^{-1}$ ):

$$F_{nt} = N_{H_2O} N_{pH} N_{st} (K_{mx} + N_{mx} N_{NH_4^+}) \quad (\text{S66})$$

$$N_{H_2O} = \left( \frac{WFPS-b}{a-b} \right)^{\frac{d(b-a)}{a-c}} \left( \frac{WFPS-c}{a-c} \right) \quad (\text{S67})$$

$$N_{pH} = 0.56 + \arctan(0.45(-5 + pH)\pi)/\pi \quad (S68)$$

$$N_{st} = -0.06 + 0.13e^{(0.07T_s)} \quad (S69)$$

$$155 \quad N_{NH_4^+} = 1 - e^{(-0.0105C_{NH_4^+})} \quad (S70)$$

where  $N_{H_2O}$ ,  $N_{pH}$ ,  $N_{st}$  and  $N_{NH_4^+}$  are the effect of soil water, pH, temperature and soil ammonium content on nitrification, respectively;  $K_{mx}$  is the N turnover coefficient ( $\text{g N ha}^{-1} \text{ day}^{-1}$ ) of a specific soil;  $N_{mx}$  is the maximum nitrification  $\text{N}_2\text{O}$  flux ( $\text{g N ha}^{-1} \text{ day}^{-1}$ ); Parameter a, b, c, d are 0.55, 1.70,  $-0.007$ , 3.22 respectively for sandy soil, and 0.60, 1.27, 0.0012, 2.84 respectively for medium-textured soil (Parton et al., 1996).

160  $\text{N}_2\text{O}$  emission from denitrification ( $F_{dn}$ ,  $\text{g N ha}^{-1} \text{ day}^{-1}$ ):

$$F_{dn} = D_{ttl}/(1 + R_{N_2/N_2O}) \quad (S71)$$

$$D_{ttl} = \min(f_{dn}(NO_3^-), f_{dn}(CO_2))f_{dn}(WFPS) \quad (S72)$$

$$R_{N_2/N_2O} = \min(f_r(NO_3^-), f_r(CO_2))f_r(WFPS) \quad (S73)$$

$$f_{dn}(NO_3^-) = 11000 + 40000 \arctan(0.002(C_{NO_3^-} - 180)\pi)/\pi \quad (S74)$$

$$165 \quad f_{dn}(CO_2) = 24000/(1 + 200/e^{(0.35CO_2)}) \quad (S75)$$

$$f_{dn}(WFPS) = a/b^{(c/(b^{dWFPS}))} \quad (S76)$$

$$f_r(NO_3^-) = 1 - 25(0.5 + \arctan(0.01(C_{NO_3^-} - 190)\pi)/\pi) \quad (S77)$$

$$f_r(CO_2) = 13 + 30.78 \arctan(0.07(CO_2 - 13)\pi)/\pi \quad (S78)$$

$$f_r(WFPS) = 1.4/13^{(17/(13^{2.2WFPS}))} \quad (S79)$$

170 where  $D_{ttl}$  is total nitrogen gas ( $\text{N}_2\text{O}$  and  $\text{N}_2$ ) flux ( $\text{g N ha}^{-1} \text{ day}^{-1}$ ) from denitrification;  $R_{N_2/N_2O}$  is the ratio of  $\text{N}_2$  and  $\text{N}_2\text{O}$  of total denitrification gas fluxes;  $f_{dn}(NO_3^-)$  and  $f_{dn}(CO_2)$  are the maximum total N gas fluxes ( $\text{g N ha}^{-1} \text{ day}^{-1}$ ) for a given soil nitrate level and respiration rate, respectively;  $f_{dn}(WFPS)$  is the effect of WFPS on denitrification rate;  $f_r(NO_3^-)$ ,  $f_r(CO_2)$  and  $f_r(WFPS)$  are the effect of soil nitrate, soil respiration and WFPS on the ratio of  $\text{N}_2$  and  $\text{N}_2\text{O}$ ;  $CO_2$  is the soil respiration rate ( $\text{kg C ha}^{-1} \text{ day}^{-1}$ ) (Parton et al., 1996); Parameter a, b, c, d are 1.56, 12.0, 16.0, 2.01 respectively for sandy  
175 soil, 4.82, 14.0, 16.0, 1.39, respectively for medium-textured soil, and 60.0, 18.0, 22.0, 1.03, respectively for loam soil (Parton et al., 1996).

**Table S1.** Inversed values of primary parameters for different models.

| Models | Parameters                                           | Value  | Range       | Literature                                                                  |
|--------|------------------------------------------------------|--------|-------------|-----------------------------------------------------------------------------|
| NOE    | $R_{pdn}$ ( $\text{kg N ha}^{-1} \text{ day}^{-1}$ ) | 4.514  | 1.0–16.9    | Henault and Germon, 2000; Henault et al., 2001, 2005; Garrido et al., 2002. |
|        | $r_{max}$                                            | 0.562  | 0.09–0.6    |                                                                             |
|        | z                                                    | 0.009  | 0.0006–0.01 |                                                                             |
|        | a                                                    | 0.052  | 0.019–0.059 |                                                                             |
|        | b                                                    | -0.085 | -0.4 – -0.1 |                                                                             |

|         |                                                               |        |               |                                                                                                                 |
|---------|---------------------------------------------------------------|--------|---------------|-----------------------------------------------------------------------------------------------------------------|
| NGAS    | Kmx (g N ha <sup>-1</sup> day <sup>-1</sup> )                 | 17.874 | 3.8–28.6      | Parton et al., 1988, 1996.                                                                                      |
|         | Nmx (g N ha <sup>-1</sup> day <sup>-1</sup> )                 | 16.645 | 15.9–30.0     |                                                                                                                 |
| DLEM    | V <sub>nt,max</sub> (g N m <sup>-3</sup> day <sup>-1</sup> )  | 0.10   | 0–0.109       | Kim et al., 1997; Garcia–Ruiz et al., 1998; Starry et al., 2005;                                                |
|         | V <sub>dnt,max</sub> (g N m <sup>-3</sup> day <sup>-1</sup> ) | 0.050  | 0–2.18        |                                                                                                                 |
|         | Km <sub>nt</sub> (g N m <sup>-3</sup> )                       | 0.676  | 0.21–1.11     |                                                                                                                 |
|         | Km <sub>dn</sub> (g N m <sup>-3</sup> )                       | 1.625  | 0.18–6.5      |                                                                                                                 |
| DyN     | F <sub>max</sub> (day <sup>-1</sup> )                         | 0.05   | 0.01–0.1      | Ingwersen et al., 1999; Groffman et al., 2000; Breuer et al., 2002; Khalil et al., 2004; Well and Flessa, 2008. |
|         | r <sub>nt</sub> (day <sup>-1</sup> )                          | 0.002  | < 0.001–0.002 |                                                                                                                 |
|         | r <sub>dn</sub> (day <sup>-1</sup> )                          | 0.024  | 0.002–0.47    |                                                                                                                 |
| DayCENT | F <sub>max</sub> (day <sup>-1</sup> )                         | 0.10   | 0.01–0.1      | Groffman et al., 2000; Parton et al., 2001.                                                                     |
|         | K <sub>1</sub>                                                | 0.02   | 0.05–0.12     |                                                                                                                 |
|         | K <sub>2</sub>                                                | 0.21   | 0.05–0.25     |                                                                                                                 |
| DNDC    | R <sub>nt,max</sub> (l day <sup>-1</sup> )                    | 0.108  | 0.05–0.12     | Blogadatsky et al., 1998. Hartel and Alexander, 1987; Hosen et al., 2000.                                       |
|         | R <sub>g,max</sub> (l day <sup>-1</sup> )                     | 4.873  | 3.5–5.9       |                                                                                                                 |
|         | R <sub>d,max</sub> (l day <sup>-1</sup> )                     | 1.300  | 1.2–1.6       |                                                                                                                 |
|         | D <sub>max</sub> (m <sup>2</sup> h <sup>-1</sup> )            | 0.052  | 0.006–0.055   |                                                                                                                 |
